# Supplementary material for: Room temperature ionic liquid assisted synthesis of ultra-stable Au nanoparticles via a modified Brust–Schiffrin method
Source: Royal Society of Chemistry journal article supplement (doi:10.1039/c6ra17663a), 2016-01-01
Supplement: c6ra17663a1.pdf [file c6ra17663a1.pdf]

Supporting Information

## Room temperature ionic liquid assisted synthesis of ultra-stable Au nanoparticles via a modified Brust-Schiffrin method

Limin Wu, Jingfang Zhou\* and Haolan Xu\*

| RTIL                                      | Miscible with toluene | Extraction of AuCl <sub>4</sub> <sup>-</sup> | Other          |
|-------------------------------------------|-----------------------|----------------------------------------------|----------------|
| P <sub>14,6,6,6</sub> NTf <sub>2</sub>    | √                     | √                                            |                |
| P <sub>14,6,6,6</sub> Cl                  | √                     | -                                            | Turbid mixture |
| P <sub>14,6,6,6</sub> Br                  | √                     | √                                            |                |
| P <sub>14,6,6,6</sub> NH(CN) <sub>2</sub> | √                     | √                                            |                |
| P <sub>14,6,6,6</sub> PF <sub>6</sub>     | √                     | √                                            |                |
| P <sub>8,8,8,8</sub> Br                   | √                     | √                                            |                |
| P <sub>14,4,4,4</sub> Cl                  | √                     | -                                            | Turbid mixture |
| P <sub>4,4,4,4</sub> Cl                   | √                     | ×                                            |                |
| N <sub>8,8,8,1</sub> NTf <sub>2</sub>     | √                     | √                                            |                |
| N <sub>4,1,1,1</sub> NTf <sub>2</sub>     | ×                     | ×                                            |                |
| EMIM NTf <sub>2</sub>                     | ×                     | -                                            |                |
| HMIM NTf <sub>2</sub>                     | ×                     | -                                            |                |
| HMIM PF <sub>6</sub>                      | ×                     | -                                            |                |
| MPPiper NTf <sub>2</sub>                  | ×                     | -                                            |                |
| MPPyro NTf <sub>2</sub>                   | ×                     | -                                            |                |
| PPri NTf <sub>2</sub>                     | ×                     | -                                            |                |

**Table S1.** List of the sixteen RTILs and the corresponding physical and chemical properties.

√: positive; ×: negative; -: data not available

| Name                                                              | Abbreviation                       | Structure                                                                                                                                                                                                                                                        |
|-------------------------------------------------------------------|------------------------------------|------------------------------------------------------------------------------------------------------------------------------------------------------------------------------------------------------------------------------------------------------------------|
| Trihexyltetradecylphosphonium bis (trifluoromethylsulfonyl) imide | $P_{14,6,6,6}$ NTf <sub>2</sub>    | $\begin{array}{c} (\text{CH}_2)_5\text{CH}_3 \\   \\ \text{H}_3\text{C}(\text{H}_2\text{C})_5-\text{P}^+-\text{(CH}_2\text{)}_{13}\text{CH}_3 \\   \\ (\text{CH}_2)_5\text{CH}_3 \\ \text{F}_3\text{CO}_2\text{S}^-\text{N}^-\text{SO}_2\text{CF}_3 \end{array}$ |
| Trihexyltetradecylphosphonium bromide                             | $P_{14,6,6,6}$ Br                  | $\begin{array}{c} (\text{CH}_2)_5\text{CH}_3 \\   \\ \text{H}_3\text{C}(\text{H}_2\text{C})_5-\text{P}^+-\text{(CH}_2\text{)}_{13}\text{CH}_3 \\   \\ (\text{CH}_2)_5\text{CH}_3 \quad \text{Br}^- \end{array}$                                                  |
| Trihexyltetradecylphosphonium hexafluorophosphate                 | $P_{14,6,6,6}$ PF <sub>6</sub>     | $\begin{array}{c} (\text{CH}_2)_5\text{CH}_3 \\   \\ \text{H}_3\text{C}(\text{H}_2\text{C})_5-\text{P}^+-\text{(CH}_2\text{)}_{13}\text{CH}_3 \\   \\ (\text{CH}_2)_5\text{CH}_3 \quad \text{PF}_6^- \end{array}$                                                |
| Trihexyltetradecylphosphonium dicyanamide                         | $P_{14,6,6,6}$ NH(CN) <sub>2</sub> | $\begin{array}{c} (\text{CH}_2)_5\text{CH}_3 \\   \\ \text{H}_3\text{C}(\text{H}_2\text{C})_5-\text{P}^+-\text{(CH}_2\text{)}_{13}\text{CH}_3 \\   \\ (\text{CH}_2)_5\text{CH}_3 \quad \text{NC}^-\text{N}^-\text{CN} \end{array}$                               |

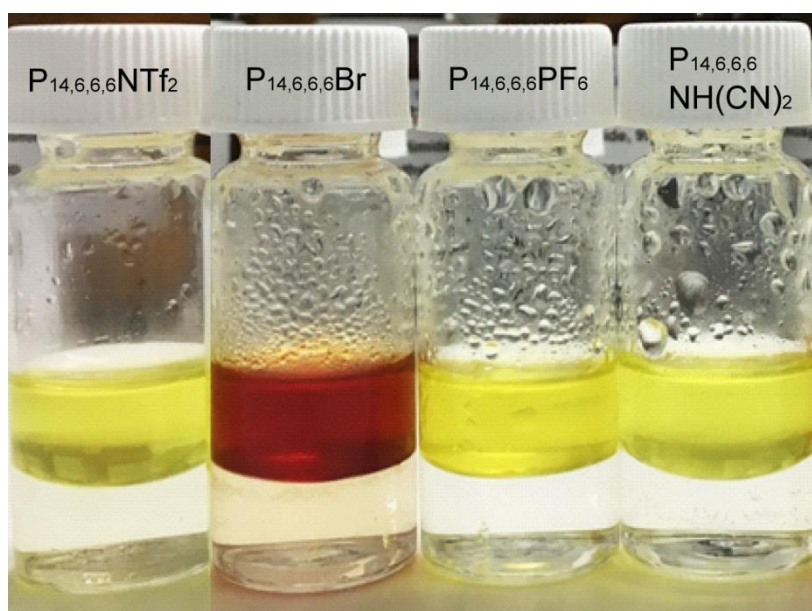

**Fig. S1** List of the selected RTILs and the digital photographs of water-RTILs after Au ion extraction, the upper layers are RTILs containing extracted Au ion.

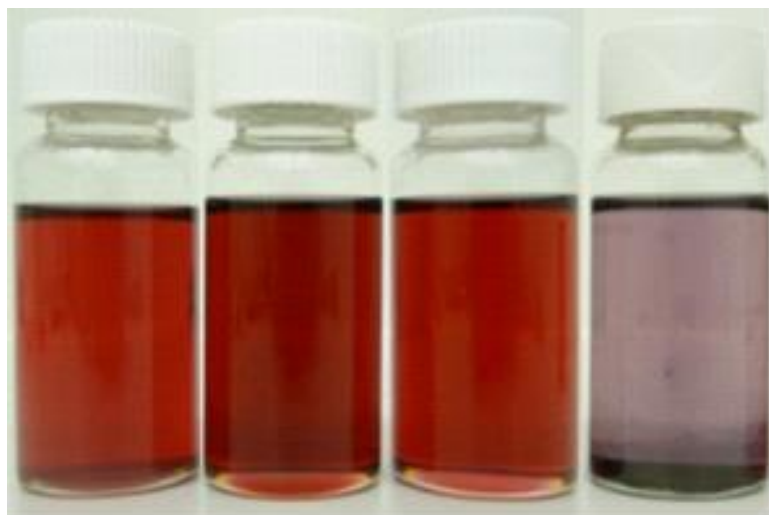

|                                     |                                              |                                |                                             |                                                 |
|-------------------------------------|----------------------------------------------|--------------------------------|---------------------------------------------|-------------------------------------------------|
| <b>Ionic Liquid</b>                 | Au@P <sub>14,6,6,6</sub><br>NTf <sub>2</sub> | Au@P <sub>14,6,6,6</sub><br>Br | Au@P <sub>14,6,6,6</sub><br>PF <sub>6</sub> | Au@P <sub>14,6,6,6</sub><br>NH(CN) <sub>2</sub> |
| <b>Average Zeta<br/>Size(d. nm)</b> | 6.5±1.8                                      | 6.0±1.2                        | 7.0±1.8                                     | 10.1±2.2                                        |

**Fig. S2** Digital photographs and DLS size of the Au@P<sub>14,6,6,6</sub>NTf<sub>2</sub>, Au@P<sub>14,6,6,6</sub>Br, Au@P<sub>14,6,6,6</sub>PF<sub>6</sub>, and Au@P<sub>14,6,6,6</sub>NH(CN)<sub>2</sub> NPs (from left to right).

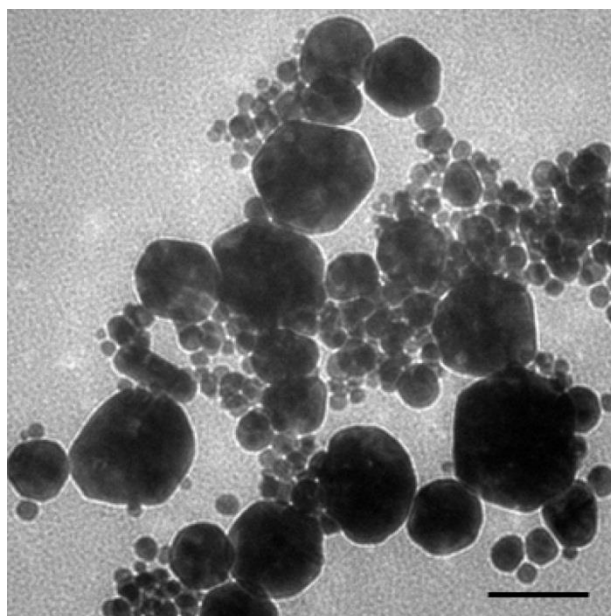

**Fig. S3** TEM image of Au NPs prepared with TOAB via BS method, the scale bar is 50 nm.

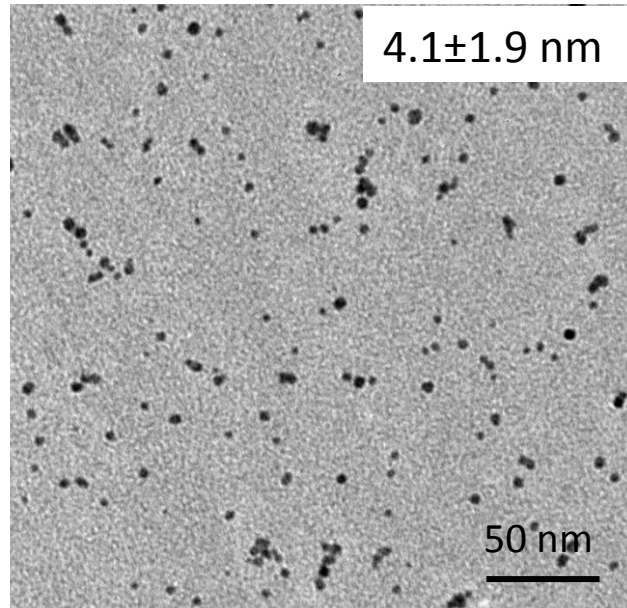

**Fig. S4** TEM image of the Au@P<sub>14,6,6,6</sub>NTf<sub>2</sub> NPs synthesized when R is 16.

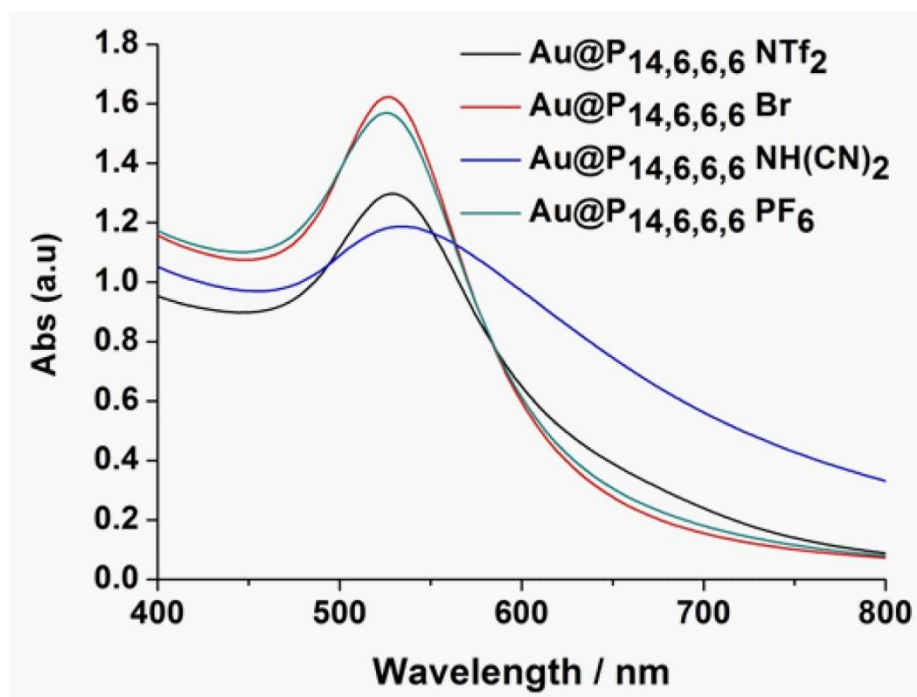

**Fig. S5** UV-vis spectra of the Au@P<sub>14,6,6,6</sub>NTf<sub>2</sub>, Au@P<sub>14,6,6,6</sub>Br, Au@P<sub>14,6,6,6</sub>PF<sub>6</sub>, and Au@P<sub>14,6,6,6</sub>NH(CN)<sub>2</sub> NPs.

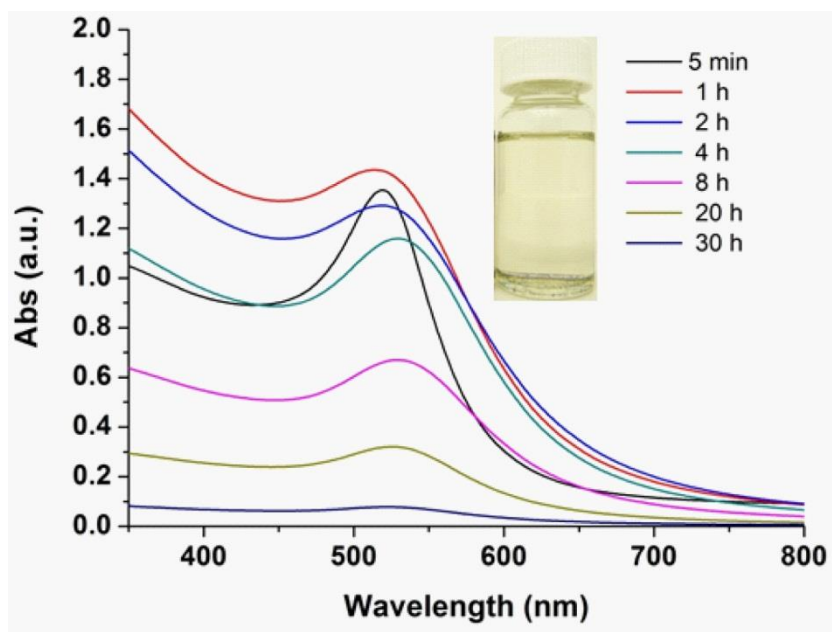

**Fig. S6** UV-Vis spectra of Au@TOAB NPs along with storage period. The particles precipitated out after 30 h.

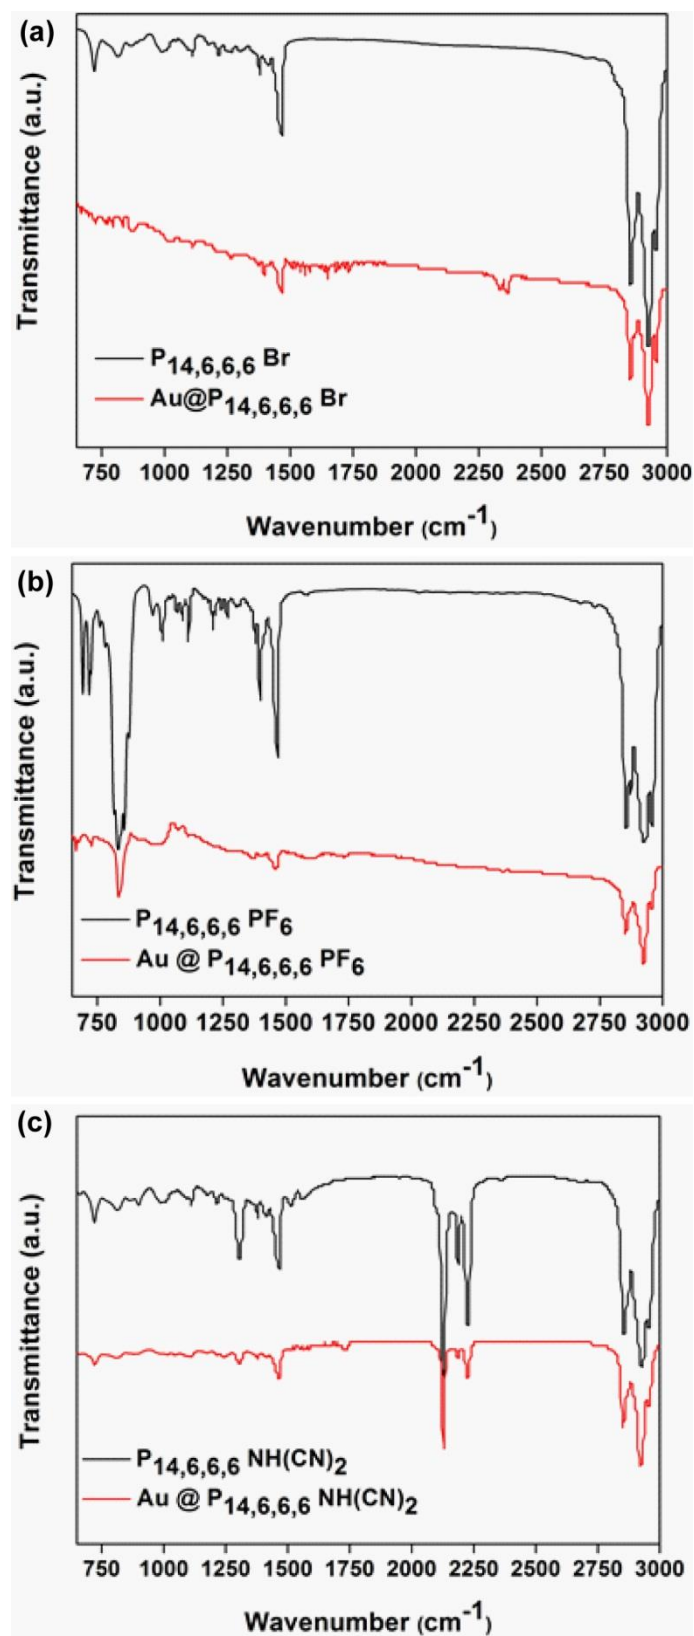

**Fig. S7** FTIR spectra of (a)  $\text{Au@P}_{14,6,6,6} \text{Br}$  NPs and pure  $\text{P}_{14,6,6,6} \text{Br}$ , (b)  $\text{Au@P}_{14,6,6,6} \text{PF}_6$  and pure  $\text{P}_{14,6,6,6} \text{PF}_6$  and (c)  $\text{Au@P}_{14,6,6,6} \text{NH}(\text{CN})_2$  NPs and pure  $\text{P}_{14,6,6,6} \text{NH}(\text{CN})_2$ .



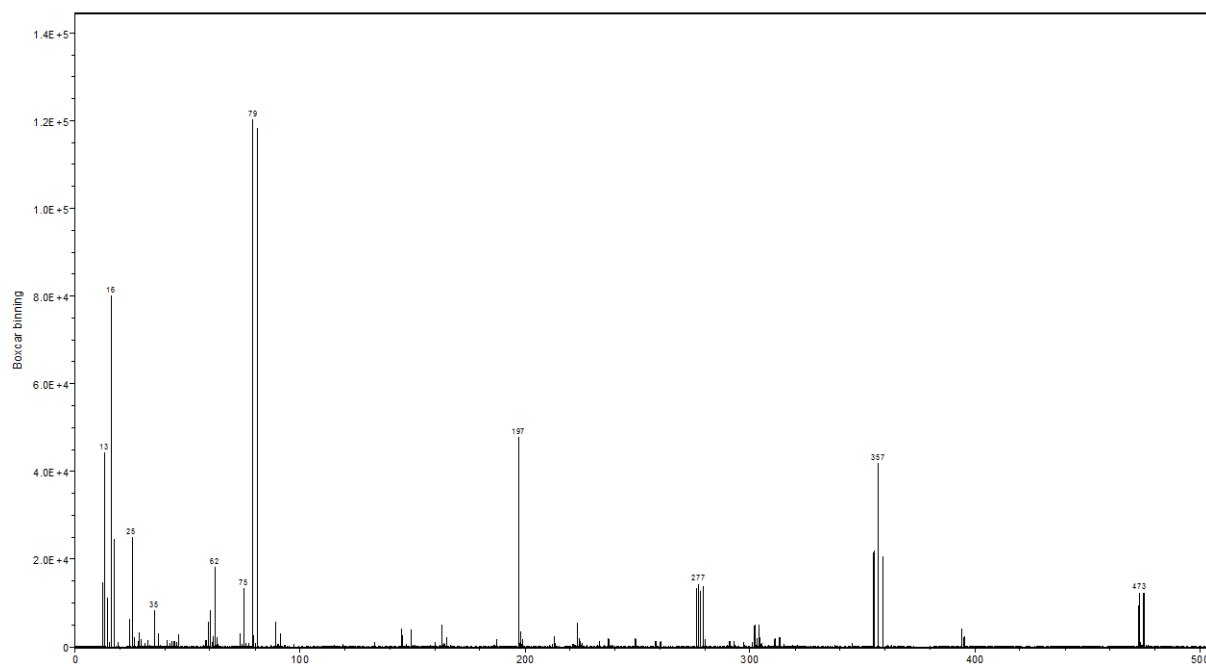


---

|            |    |    |    |       |     |         |     |         |
|------------|----|----|----|-------|-----|---------|-----|---------|
| <b>m/z</b> | 13 | 16 | 19 | 35,37 | 145 | 232,277 | 197 | 397~485 |
|------------|----|----|----|-------|-----|---------|-----|---------|

---

|                  |                 |                |                |                                                               |                              |                                                                  |                 |                                                      |
|------------------|-----------------|----------------|----------------|---------------------------------------------------------------|------------------------------|------------------------------------------------------------------|-----------------|------------------------------------------------------|
| <b>Main Ions</b> | CH <sup>-</sup> | O <sup>-</sup> | F <sup>-</sup> | <sup>35</sup> Cl <sup>-</sup> , <sup>37</sup> Cl <sup>-</sup> | PF <sub>6</sub> <sup>-</sup> | Au <sup>+</sup> Cl <sup>-</sup> , AuCl <sub>2</sub> <sup>-</sup> | Au <sup>-</sup> | C <sub>n</sub> H <sub>2n+2</sub> P (M <sup>+</sup> ) |
|------------------|-----------------|----------------|----------------|---------------------------------------------------------------|------------------------------|------------------------------------------------------------------|-----------------|------------------------------------------------------|

---

**Fig. S8** ToF-SIMS spectrum and identification of the characteristic peaks of Au@P<sub>14,6,6,6</sub>PF<sub>6</sub> NPs.

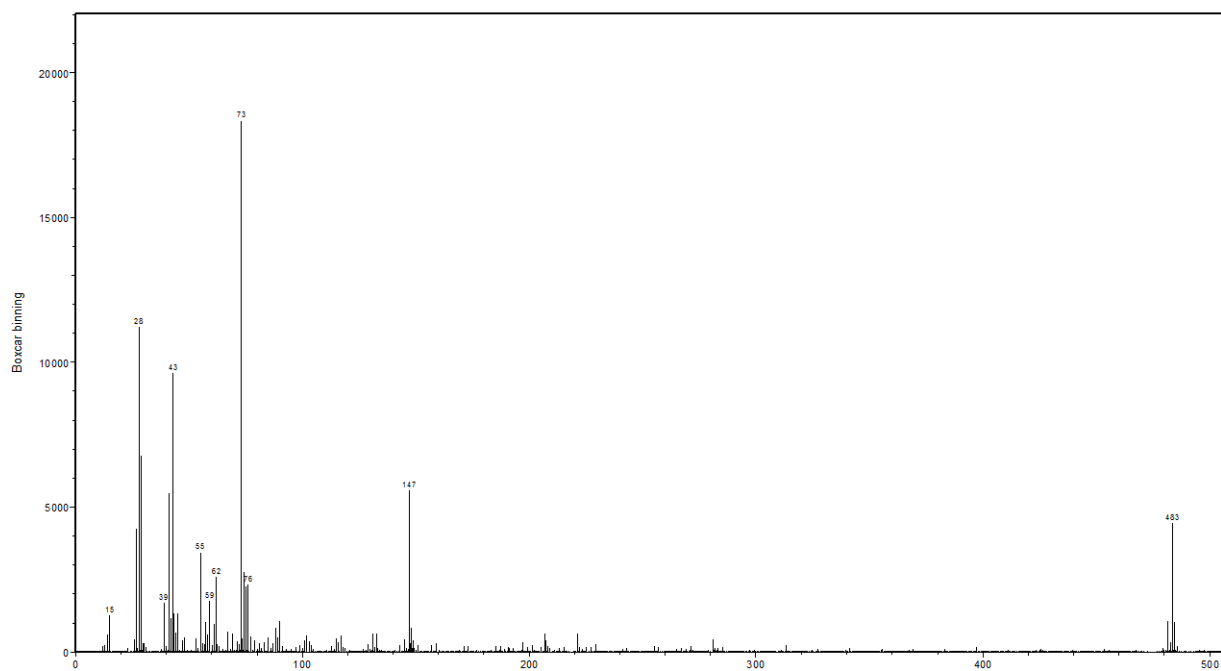

|                  |    |        |                  |                   |                                                                  |         |                                                                      |                                                                                                      |                                                                                                      |                                                                      |
|------------------|----|--------|------------------|-------------------|------------------------------------------------------------------|---------|----------------------------------------------------------------------|------------------------------------------------------------------------------------------------------|------------------------------------------------------------------------------------------------------|----------------------------------------------------------------------|
| <b>m/z</b>       | 13 | 1<br>6 | 25               | 46                | 79,<br>81                                                        | 19<br>7 | 276~27<br>9                                                          | 302, 304                                                                                             | 338, 340                                                                                             | 397~48<br>5                                                          |
| <b>Main Ions</b> | CH | O      | C <sub>2</sub> H | CH <sub>3</sub> P | <sup>79</sup> Br <sup>-</sup> ,<br><sup>81</sup> Br <sup>-</sup> | Au      | AuBrH <sub>2</sub> <sup>-</sup> ,<br>AuBrH <sub>3</sub> <sup>-</sup> | C <sub>2</sub> H <sub>2</sub> AuBr <sup>-</sup> ,<br>C <sub>2</sub> H <sub>4</sub> AuBr <sup>-</sup> | C <sub>5</sub> H <sub>2</sub> AuBr <sup>-</sup> ,<br>C <sub>5</sub> H <sub>4</sub> AuBr <sup>-</sup> | C <sub>n</sub> H <sub>2n+2</sub> <sup>+</sup><br>P (M <sup>+</sup> ) |

**Fig. S9** ToF-SIMS spectrum and identification of the characteristic peaks of Au@P<sub>14,6,6,6</sub>Br NPs.
